# Supplementary material
Source: PubMed Central journal article supplement (PMC5892596)
Supplement: supp_RA118.002029_135462_1_supp_74018_p3zqrs.pdf [file supp_RA118.002029_135462_1_supp_74018_p3zqrs.pdf]

## Supplementary information

## Haploid embryonic stem cells can be enriched and maintained by simple filtration

Chao Qu<sup>1,3</sup>, Meng Yan<sup>1,3</sup>, Suming Yang<sup>1</sup>, Lingbo Wang<sup>1</sup>, Qi Yin<sup>1</sup>, Yuan Liu<sup>2</sup>, Yeguang Chen<sup>2</sup>, Jinsong Li<sup>1\*</sup>

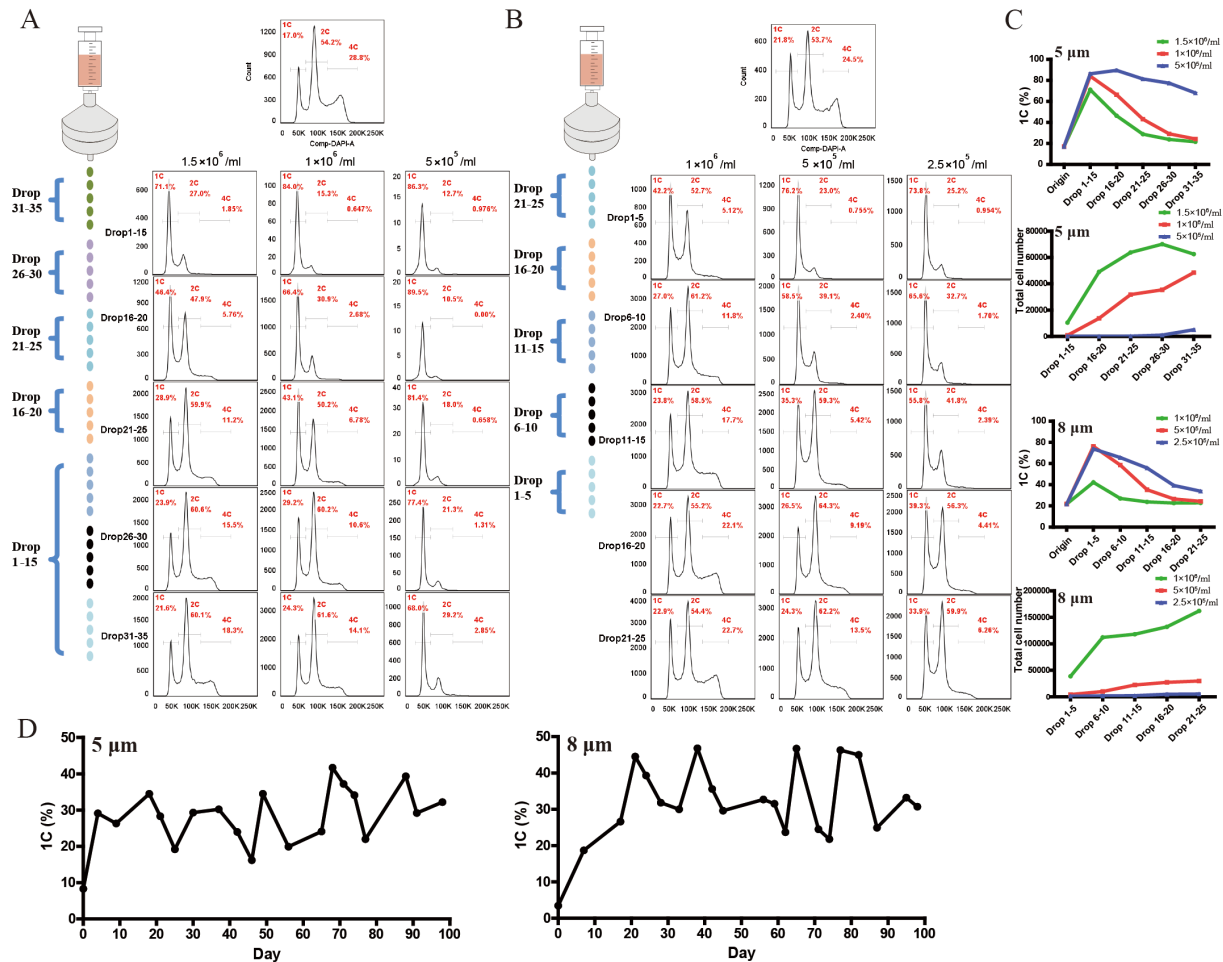

**Figure S1.** Optimizing the filtration conditions for long-term maintenance of mouse haESCs. (A) Diagram of filtrates collection strategy when using filters with 5  $\mu\text{m}$  membranes (left) and results of 1C, 2C and 4C ratios in filtrates of different drops (right). Cell suspensions with concentrations of  $1.5 \times 10^6/\text{ml}$ ,  $1 \times 10^6/\text{ml}$  and  $5 \times 10^5/\text{ml}$  were shown here. (B) Diagram of filtrates collection strategy when using filters with 8  $\mu\text{m}$  membranes (left) and results of 1C, 2C and 4C ratios in filtrates of different drops (right). Cell suspensions with concentrations of  $1 \times 10^6/\text{ml}$ ,  $5 \times 10^5/\text{ml}$  and  $2.5 \times 10^5/\text{ml}$  were shown here. (C) The concentrations of cell suspensions and pore sizes of membranes affected the distribution of 1C ratio and cell numbers in filtered drops. (D) 5  $\mu\text{m}$  and 8  $\mu\text{m}$  pore size membranes.

(D) Filters with 5 $\mu$ m (left) and 8 $\mu$ m (right) membranes could be used to long-term maintain the haploidy of another cell line, *H19 $\Delta$ <sup>DMR</sup>-IG $\Delta$ <sup>DMR</sup>-AGH-OG3*.

**Table S1. Summary of gene editing in *H19 $\Delta$ <sup>DMR</sup>-IG $\Delta$ <sup>DMR</sup>-AGH* cells enriched by filtration.**

| Targeted gene | Cell enrichment method | Transfection efficiency (%) | Established cell lines | Cell lines with expected mutation (%) | Cell lines with other mutations (%) | WT cell lines (%) |
|---------------|------------------------|-----------------------------|------------------------|---------------------------------------|-------------------------------------|-------------------|
| <i>Iqgap2</i> | FACS                   | 7.69                        | 22                     | 3 (13.64%)                            | 15 (68.18)                          | 4 (18.18)         |
| <i>Iqgap2</i> | 5 $\mu$ m filtered     | 6.15                        | 21                     | 4 (19.05)                             | 15 (71.43)                          | 2 (9.52)          |
| <i>Crygc</i>  | 5 $\mu$ m filtered     | ND <sup>a</sup>             | 28                     | 8 (28.57)                             | 12 (42.86)                          | 8 (28.57)         |
| <i>Crygc</i>  | 8 $\mu$ m filtered     | ND <sup>a</sup>             | 29                     | 6 (20.69)                             | 14 (48.28)                          | 9 (31.03)         |

<sup>a</sup> not determined

**Table S2. Primer information**

| Sequence Name           | Sequence (5'-3')                                  | Application                             |
|-------------------------|---------------------------------------------------|-----------------------------------------|
| <i>Iqgap2</i> sgRNA-1 F | CACCGAGGTCACATCAGATTACATC                         | Targeting exon 17 of <i>Iqgap2</i>      |
| <i>Iqgap2</i> sgRNA-1 R | AAACGATGTAATCTGATGTGACCTC                         |                                         |
| <i>Iqgap2</i> sgRNA-2 F | CACCGACGTCATACTTGCTTGTC                           | Targeting exon 30 of <i>Iqgap2</i>      |
| <i>Iqgap2</i> sgRNA-2 R | AAACTGACAAGCAAGTATGACGTC                          |                                         |
| <i>Iqgap2</i> F         | TTGGCTGCTGTTAAATCTGTC                             | Genotyping of 35kb deletion             |
| <i>Iqgap2</i> R         | TCATCTGCTGGTTTGATGGA                              |                                         |
| <i>Iqgap2</i> -exon17 F | GCTGTCCCTTTCATTTCCCTAA                            | Genotyping of mutations in exon 17      |
| <i>Iqgap2</i> -exon17 R | GGTAGTTGATGGTGCTGTCTTC                            |                                         |
| <i>Iqgap2</i> -exon30 F | GAGGCCCGTAAATCTCCCA                               | Genotyping of mutations in exon 30      |
| <i>Iqgap2</i> -exon30 R | GCAGACATGGACCATTAGCC                              |                                         |
| <i>Crygc</i> sgRNA F    | CACCGTCAAGAGTACCGGCGCTTCC                         | Targeting <i>Crygc</i>                  |
| <i>Crygc</i> sgRNA R    | AAACGGAAGCGCCGGTACTCTTGAC                         |                                         |
| <i>Crygc</i> /HDRP/1 F  | CCCGGGATCCTCTAGAGATTAGGTAGTTGG<br>GAATGGGAGAGTAAT | Amplification of left arm from genome   |
| <i>Crygc</i> /HDRP/1 R  | GTCCTGGAAGGCCGGTACTCTTGAGGCC                      |                                         |
| <i>Crygc</i> /HDRP/2 F  | GAGTACCGGCCTTCCAGGACTGGGGCTCT                     | Amplification of right arm from genome  |
| <i>Crygc</i> /HDRP/2 R  | CATGCCTGCAGGTCGACGATTATCTCTCCAC<br>GGTCTGCTCT     |                                         |
| <i>Crygc</i> F          | TCGACCACACTCACCCATTG                              | Genotyping of mutations of <i>Crygc</i> |
| <i>Crygc</i> R          | ACAGAAGTCAGGGTTTGCCA                              |                                         |
